# Supplementary material for: Large oriented mesoporous self-supporting Ni–Al oxide films derived from layered double hydroxide precursors
Source: Royal Society of Chemistry journal article supplement (doi:10.1039/b801620h), 2008-01-01
Supplement: b801620h.pdf [file b801620h.pdf]

**Large oriented mesoporous self-supporting Ni-Al oxide films  
derived from layered double hydroxide precursors**

Cang Li, Lianying Wang,\* Min Wei, David G. Evans and Xue Duan

*State Key Laboratory of Chemical Resource Engineering, Beijing University of  
Chemical Technology, Beijing 100029, P. R. China*

**Supplementary Information**

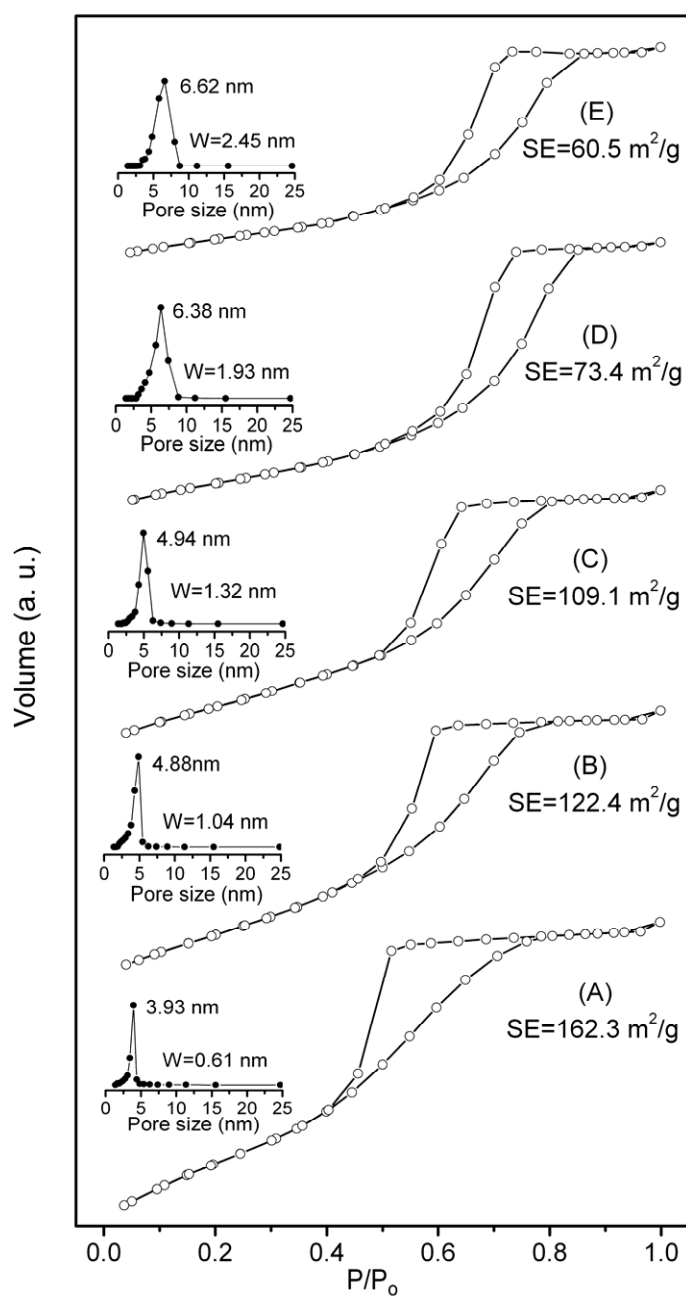

**Fig. S1** N<sub>2</sub> adsorption and desorption isotherms and corresponding pore size distribution curves (insert) for the Ni-Al oxide films prepared by heating at 500 °C (A), 600 °C (B), 700 °C (C), 800 °C (D) and 900 °C (E). (SE represents surface area and W the peak width at half-height in the pore size distribution curves).

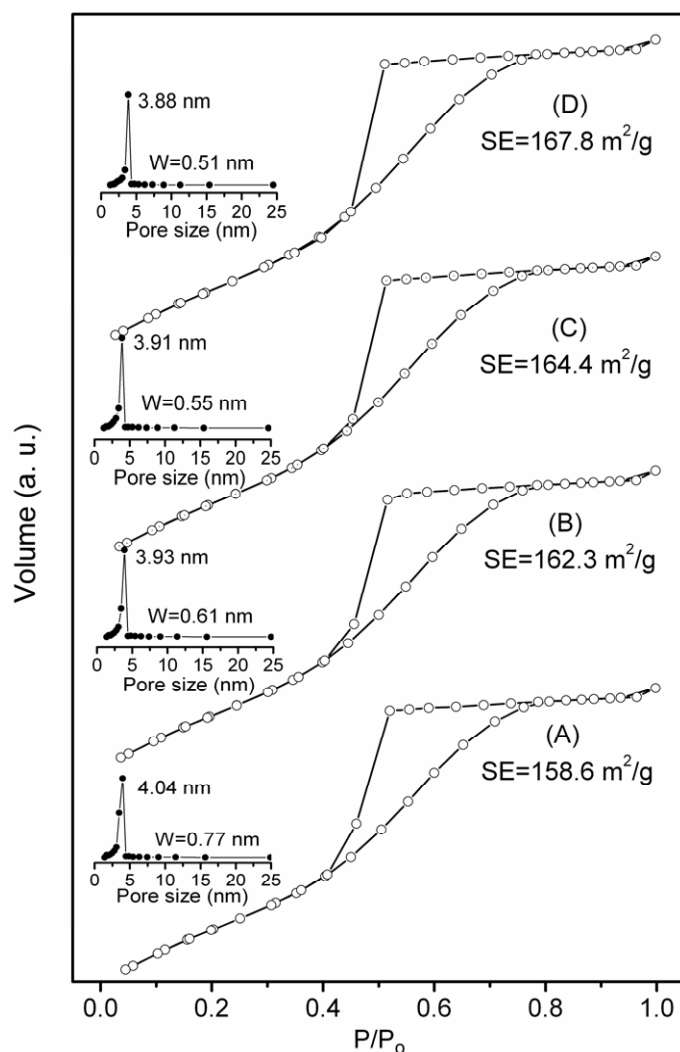

**Fig. S2**  $\text{N}_2$  adsorption and desorption isotherms and corresponding pore size distribution curves (insert) for the Ni-Al oxide films prepared by heating at 500  $^\circ\text{C}$  with an initial temperature ramping rate of 1  $^\circ\text{C}/\text{min}$  (A), 5  $^\circ\text{C}/\text{min}$  (B), 15  $^\circ\text{C}/\text{min}$  (C) and 30  $^\circ\text{C}/\text{min}$  (D). (SE represents surface area and  $W$  the peak width at half-height in the pore size distribution curves).

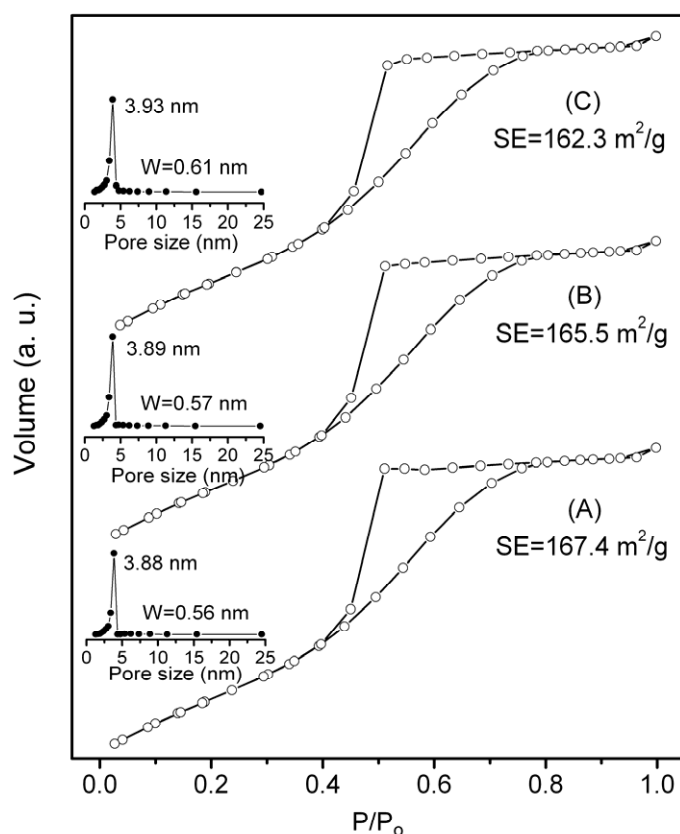

**Fig. S3** N<sub>2</sub> adsorption and desorption isotherms and corresponding pore size distribution curves (insert) for the Ni-Al oxide films prepared by heating at 500 °C with aging time of the precursor NiAl-LDH being 24 h (A), 36 h (B), and 48 h (C). The dimension of the LDH platelets in the *c* direction (as determined by the Scherrer equation using the (003) reflection) of the NiAl-LDH nanoparticles is 5.8, 6.1 and 6.6 nm respectively in (A), (B) and (C). (SE represents surface area and W the peak width at half-height in the pore size distribution curves).
